# Supplementary material for: Topology of the Electron Density and of Its Laplacian from Periodic LCAO Calculations on f-Electron Materials: The Case of Cesium Uranyl Chloride
Source: MDPI journal article supplement (doi:10.3390/molecules26144227), 2021-07-12
Supplement: s1 [file s1]

**Supporting Information:**

**Topology of the Electron Density and of its  
Laplacian from Periodic LCAO Calculations on  
*f*-Electron Materials: The Case of Cesium  
Uranyl Chloride**

Alessandro Cossard,<sup>†</sup> Silvia Casassa,<sup>†</sup> Carlo Gatti,<sup>‡</sup> Jacques K. Desmarais,<sup>\*,†</sup>  
and Alessandro Erba<sup>\*,†</sup>

<sup>†</sup>*Dipartimento di Chimica, Università di Torino, via Giuria 5, 10125 Torino, Italy*

<sup>‡</sup>*CNR-SCITEC, Istituto di Scienze e Tecnologie Chimiche “Giulio Natta”, via C. Golgi  
19, 20133 Milano, Italy*

E-mail: jacqueskontak.desmarais@unito.it; alessandro.erba@unito.it

# 1 Crystal Input for $\text{Cs}_2\text{UO}_2\text{Cl}_4$

CS2U02Cl4

CRYSTAL

0 0 0

12

11.78820 7.64110 5.76860 100.4380

4

292 0.00000 0.00000 0.00000

255 0.66487 0.00000 0.32067

17 0.39809 0.24695 0.20704

8 0.11906 0.00000 0.23790

END

292 31

INPUT

32. 0 4 8 8 8 6

16.91870874 529.53526911 0

3.40970576 4.27018845 0

0.79302733 0.09998874 0

0.19378381 0.00626781 0

13.16953414 100.93359134 0

10.60784728 175.95423897 0

2.69049397 -0.00210787 0

2.08929800 -0.19041648 0

0.54050990 0.00494627 0

0.40482776 -0.01652483 0

0.11250285 0.00082033 0

0.09508873 -0.00100028 0

9.06784123 62.85927902 0

8.53362678 90.20882494 0  
 1.63646790 -0.08282418 0  
 1.54425719 -0.15307917 0  
 0.47961552 -0.00008720 0  
 0.41164502 0.00484078 0  
 0.13990510 -0.00006136 0  
 0.17494682 -0.00240839 0  
 5.14746012 15.68628229 0  
 5.29241394 22.32105345 0  
 1.05726701 -0.20689333 0  
 0.98063114 -0.08434451 0  
 0.48259555 0.06084446 0  
 0.55434882 0.00231264 0  
 0.23674544 -0.00204069 0  
 0.21559852 0.00348388 0  
 18.83643086 -44.41029420 0  
 18.74850924 -53.65339478 0  
 6.49279545 -2.55219343 0  
 6.57472519 -3.34380088 0  
 2.58151924 0.04527524 0  
 2.58690949 0.05637947 0  
 0 0 1 2 1  
 29520.834 1.  
 0 0 1 2 1  
 4449.8874 1.  
 0 0 1 2. 1  
 1018.7754 1.  
 0 0 1 0 1  
 289.5348 1.

0 0 1 0 1  
46.9990 1.  
0 0 1 0 1  
23.9791 1.  
0 0 1 0 1  
10.1441 1.  
0 0 1 0 1  
2.7658 1.  
0 0 1 0 1  
0.6151 1.  
0 0 1 0 1  
0.2780 1.  
0 2 1 6 1  
499.7488 1.  
0 2 1 6 1  
114.0192 1.  
0 2 1 0 1  
15.6492 1.  
0 2 1 0 1  
7.9843 1.  
0 2 1 0 1  
3.1325 1.  
0 2 1 0 1  
1.6077 1.  
0 2 1 0 1  
0.7061 1.  
0 2 1 0 1  
0.3229 1.  
0 3 1 10 1

75.1703 1.  
 0 3 1 1 1  
 20.7869 1.  
 0 3 1 0 1  
 5.5167 1.  
 0 3 1 0 1  
 2.6058 1.  
 0 3 1 0 1  
 1.2781 1.  
 0 3 1 0 1  
 0.5617 1.  
 0 3 1 0 1  
 0.2135 1.  
 0 4 1 3. 1  
 8.1761 1.  
 0 4 1 0 1  
 3.5111 1.  
 0 4 1 0 1  
 1.6789 1.  
 0 4 1 0 1  
 0.7604 1.  
 0 4 1 0 1  
 0.3170 1.  
 0 5 1 0 1  
 0.7604 1  
 255 3  
 HAYWSC  
 0 1 3 8 1  
 2.7869668567 0.0406474598702 -0.0165526980724

1.15910578043 -0.555331349468 -0.156354595401

0.444885148239 0.790078910046 0.653388515688

0 1 1 1 1

0.152606321165 1. 1.

0 3 1 0 1

0.599990264849 1.

17 13

0 0 7 2 1

|               |                   |
|---------------|-------------------|
| 69507.9909450 | 0.54314897497D-03 |
|---------------|-------------------|

|               |                   |
|---------------|-------------------|
| 10426.1568800 | 0.41990463961D-02 |
|---------------|-------------------|

|              |                   |
|--------------|-------------------|
| 2373.2334061 | 0.21592141679D-01 |
|--------------|-------------------|

|              |                   |
|--------------|-------------------|
| 671.56420071 | 0.84598850094D-01 |
|--------------|-------------------|

|              |               |
|--------------|---------------|
| 218.41999790 | 0.24757249724 |
|--------------|---------------|

|              |               |
|--------------|---------------|
| 77.572249714 | 0.47016930228 |
|--------------|---------------|

|              |               |
|--------------|---------------|
| 28.888815277 | 0.37436370716 |
|--------------|---------------|

0 0 3 2 1

|              |                   |
|--------------|-------------------|
| 127.10527185 | 0.25182166603D-01 |
|--------------|-------------------|

|              |               |
|--------------|---------------|
| 39.339582961 | 0.10786112456 |
|--------------|---------------|

|              |                |
|--------------|----------------|
| 7.6740679989 | -0.27408821574 |
|--------------|----------------|

0 0 2 2 1

|              |              |
|--------------|--------------|
| 3.8745627630 | 1.3213875014 |
|--------------|--------------|

|              |               |
|--------------|---------------|
| 1.8385832573 | 0.68636955368 |
|--------------|---------------|

0 0 1 0 1

|               |           |
|---------------|-----------|
| 0.50229057542 | 1.0000000 |
|---------------|-----------|

0 0 1 0 1

|               |           |
|---------------|-----------|
| 0.17962723420 | 1.0000000 |
|---------------|-----------|

0 2 5 6 1

|              |                   |
|--------------|-------------------|
| 666.50423284 | 0.23632663836D-02 |
|--------------|-------------------|

|              |                   |
|--------------|-------------------|
| 157.64241690 | 0.18879300374D-01 |
|--------------|-------------------|

|               |                   |
|---------------|-------------------|
| 50.262520978  | 0.87206341273D-01 |
| 18.536078105  | 0.25285612970     |
| 7.2940532777  | 0.43507154820     |
| 0 2 1 5 1     |                   |
| 2.9433248995  | .35026513165      |
| 0 2 1 0 1     |                   |
| 1.0404970818  | 1.0000000         |
| 0 2 1 0 1     |                   |
| 0.38456415080 | 1.0000000         |
| 0 2 1 0 1     |                   |
| 0.13069642732 | 1.0000000         |
| 0 3 2 0 1     |                   |
| 4.61000000    | 0.20000000        |
| 1.01100000    | 1.00000000        |
| 0 3 1 0 1     |                   |
| 0.339000000   | 1.0000000         |
| 0 4 1 0 1     |                   |
| 0.706000000   | 1.0000000         |
| 8 11          |                   |
| 0 0 6 2 1     |                   |
| 27032.3826310 | 0.21726302465D-03 |
| 4052.3871392  | 0.16838662199D-02 |
| 922.32722710  | 0.87395616265D-02 |
| 261.24070989  | 0.35239968808D-01 |
| 85.354641351  | 0.11153519115     |
| 31.035035245  | 0.25588953961     |
| 0 0 2 2 1     |                   |
| 12.260860728  | 0.39768730901     |
| 4.9987076005  | 0.24627849430     |

|            |               |                   |
|------------|---------------|-------------------|
| 0 0 1 0 1  |               |                   |
|            | 1.1703108158  | 1.0000000         |
| 0 0 1 0 1  |               |                   |
|            | 0.46474740994 | 1.0000000         |
| 0 0 1 0 1  |               |                   |
|            | 0.18504536357 | 1.0000000         |
| 0 2 4 4 1  |               |                   |
|            | 63.274954801  | 0.60685103418D-02 |
|            | 14.627049379  | 0.41912575824D-01 |
|            | 4.4501223456  | 0.16153841088     |
|            | 1.5275799647  | 0.35706951311     |
| 0 2 1 0 1  |               |                   |
|            | 0.52935117943 | .44794207502      |
| 0 2 1 0 1  |               |                   |
|            | 0.17478421270 | .24446069663      |
| 0 3 1 0 1  |               |                   |
|            | 2.31400000    | 1.0000000         |
| 0 3 1 0 1  |               |                   |
|            | 0.64500000    | 1.0000000         |
| 0 4 1 0 1  |               |                   |
|            | 1.42800000    | 1.0000000         |
| 99 0       |               |                   |
| END        |               |                   |
| DFT        |               |                   |
| XXLGRID    |               |                   |
| B3LYP      |               |                   |
| ENDDFT     |               |                   |
| TOLINTEG   |               |                   |
| 8 8 8 8 20 |               |                   |



MAXCYCLE

200

FMIXING

95

SMEAR

0.0001

SHRINK

6 6

TOLDEE

9

PPAN

END
